# Supplementary material for: Tuning Piezo ion channels to detect molecular-scale movements relevant for fine touch
Source: PubMed Central journal article supplement — Nat Commun. 2014 Mar 24;5:3520. doi: 10.1038/ncomms4520 (PMC3973071; doi:10.1038/ncomms4520), 2014-03-24
Supplement: ncomms4520-s1.pdf [file ncomms4520-s1.pdf]

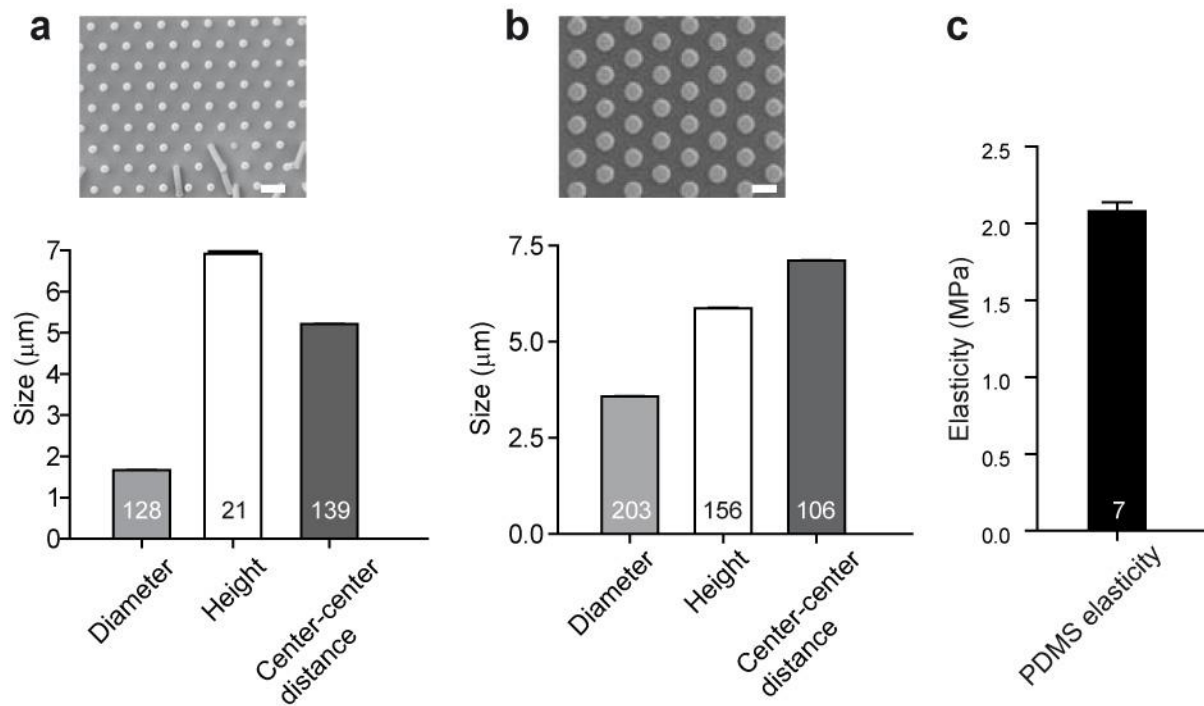

### Supplementary Figure 1: Physical properties of pillar arrays

**(a,b)** Dimensions of individual pillar elements determined from scanning electron micrographs (SEM). SEM images (scale bar 5  $\mu\text{m}$ ) were acquired from either square or side-on of pillar arrays sputtered with gold. The diameter and center-center distance were determined from images taken square to the array and the height was calculated from images taken perpendicular to the individual elements. In all cases 5 individual masters were used to cast arrays for imaging and multiple elements from each were measured, offline, using ImageJ. Data are displayed as mean  $\pm$  s.e.m.;  $n$  indicates number of individual elements measured. **(c)** Blocks of PDMS cured under the same conditions as the pillar arrays were probed using atomic force spectroscopy to determine PDMS elasticity. At least 250 force-distance curves were obtained on each of 7 PDMS samples, in PBS using a silicon cantilever with a spring constant of 0.125 N/m. Elasticity was calculated using the Hertz model for measurements made with a pyramidal indenter.

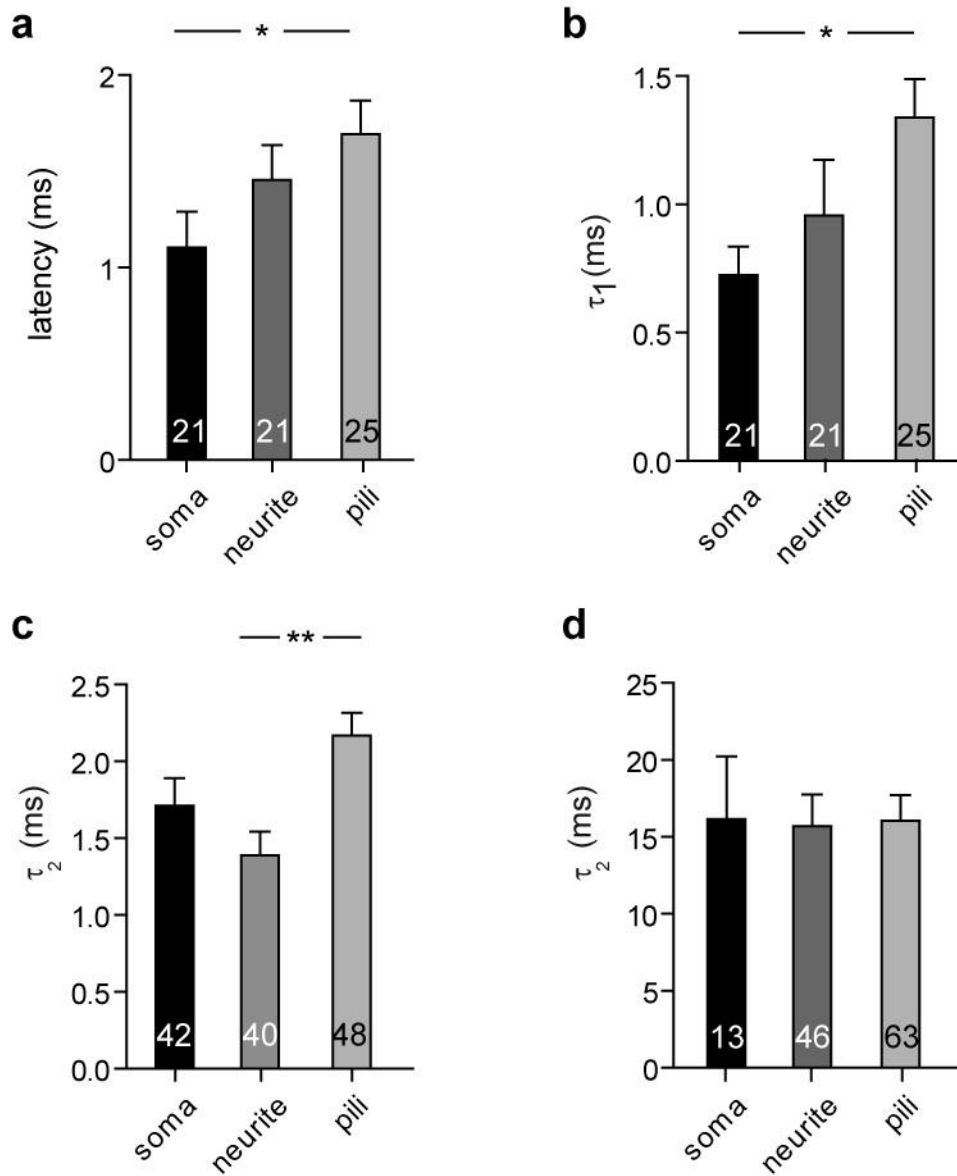

**Supplementary Figure 2: Current kinetics as measured using different methods.**

In order to compare current latencies (**a**) and the activation time constant ( $\tau_1$ , **b**) values were averaged for each cell and then an average of these values was taken. Data displayed as mean  $\pm$  s.e.m. and  $n$  indicates number of cells. Soma and neurite indentation measurements were matched, i.e. taken from the same cell. In order to compare the inactivation time constant ( $\tau_2$ , **c** (RA-currents), **d** (IA-currents)) each individual current was used as a data point due to the variability in each individual cell, as such  $n$  indicates number of currents measured, data is mean  $\pm$  s.e.m.

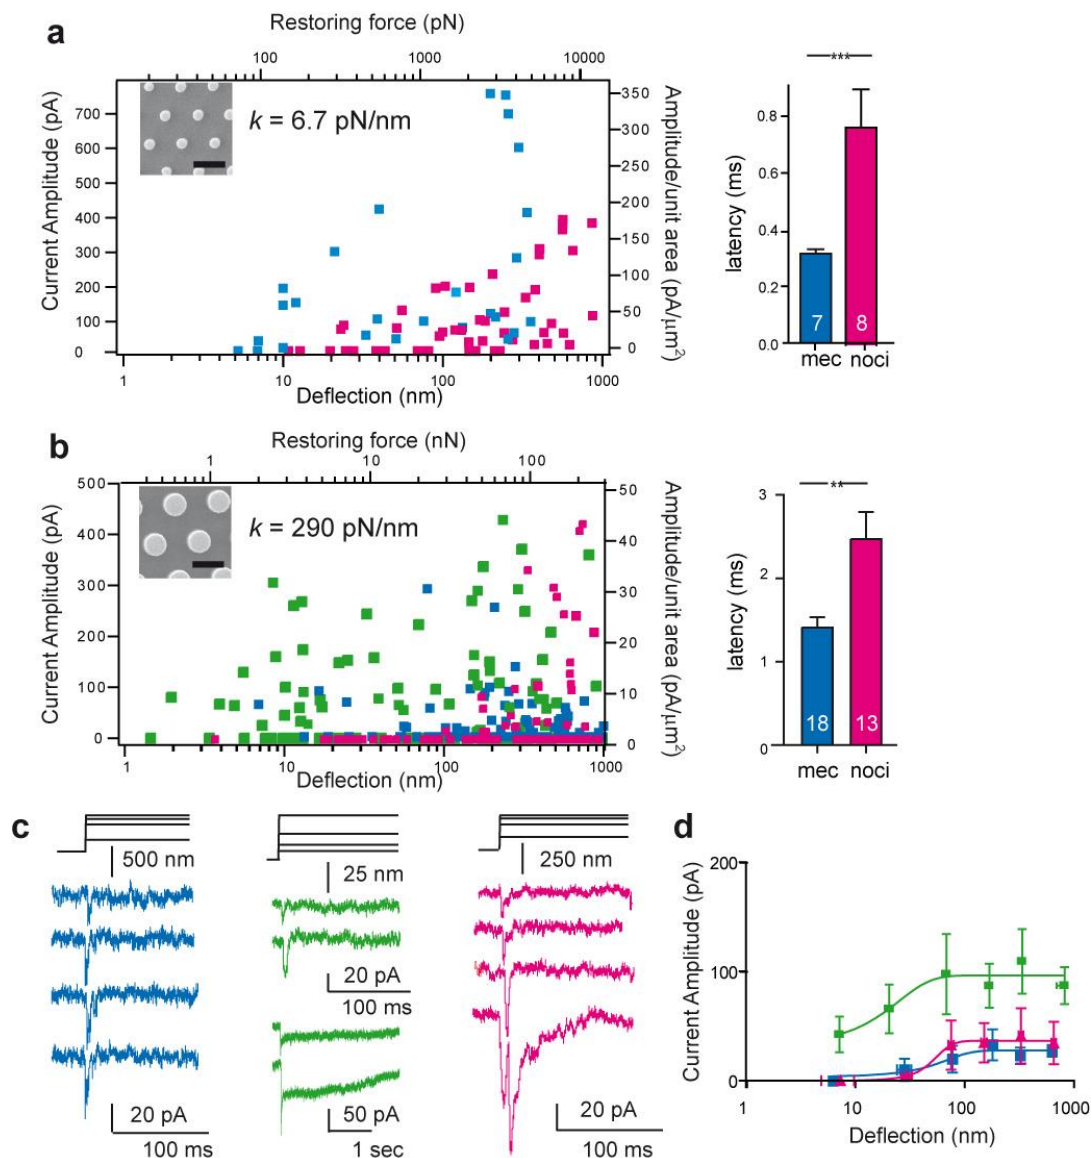

### Supplementary Figure 3: Mechanosensitive properties of sensory neurons

(a) A stimulus-response plot of individual data points (blue-mechanoreceptors; magenta- nociceptors) collected on arrays where  $k = 6.7$  pN/nm (insert scale bar  $5 \mu\text{m}$ ). In mechanoreceptors mechanically-gated currents are observed when pili are deflected as little as 10 nm, however, in nociceptors, larger deflections are required. Data represents 22 currents from 7 mechanoreceptors and 48 currents from 8 nociceptors. The latency of channel gating was significantly shorter in mechanoreceptors vs nociceptors ( $n$  is number of cells; Student's  $t$ -test, \*\*\*  $p < 0.001$ ). (b) Stimulus-response plot of individual data points (blue-Type I mechanoreceptors; green- Type II mechanoreceptors; magenta- nociceptors) collected on arrays where  $k = 290$  pN/nm (insert scale bar  $5 \mu\text{m}$ ). Channel gating in mechanoreceptors can occur with cell-substrate deflections of tens of nanometers, whereas much larger deflections are required for channel gating in nociceptors, (Type I mechanoreceptors: 114 measurements, 9 cells; Type II mechanoreceptors: 129 measurements, 8 cells; nociceptors: 110 data pts/13 cells). The latency of channel gating was, again, significantly shorter in mechanoreceptors vs nociceptors ( $n$  is number of cells; Student's  $t$ -test, \*  $p < 0.05$ ). The longer latencies on pili where  $k = 290$  pN/nm likely reflect a dampening of the stimulus by the stiffer substrate. (data in (b) also shown in Figure 3). (c) Current traces from individual neurons; Type I mechanoreceptor (blue), Type II mechanoreceptor (green) and nociceptor (magenta). (d) Averaged stimulus-response curves for Type I (blue symbols/trace), Type II (green symbols/trace) mechanoreceptors and nociceptors (magenta symbols/trace). Data has been fit with a Boltzmann function with constraint that the minimum value is set to zero (Type I: 114 measurements from 9 cells; Type II: 129 measurements from 8 cells; Nociceptor: 110 data pts from 13 cells).

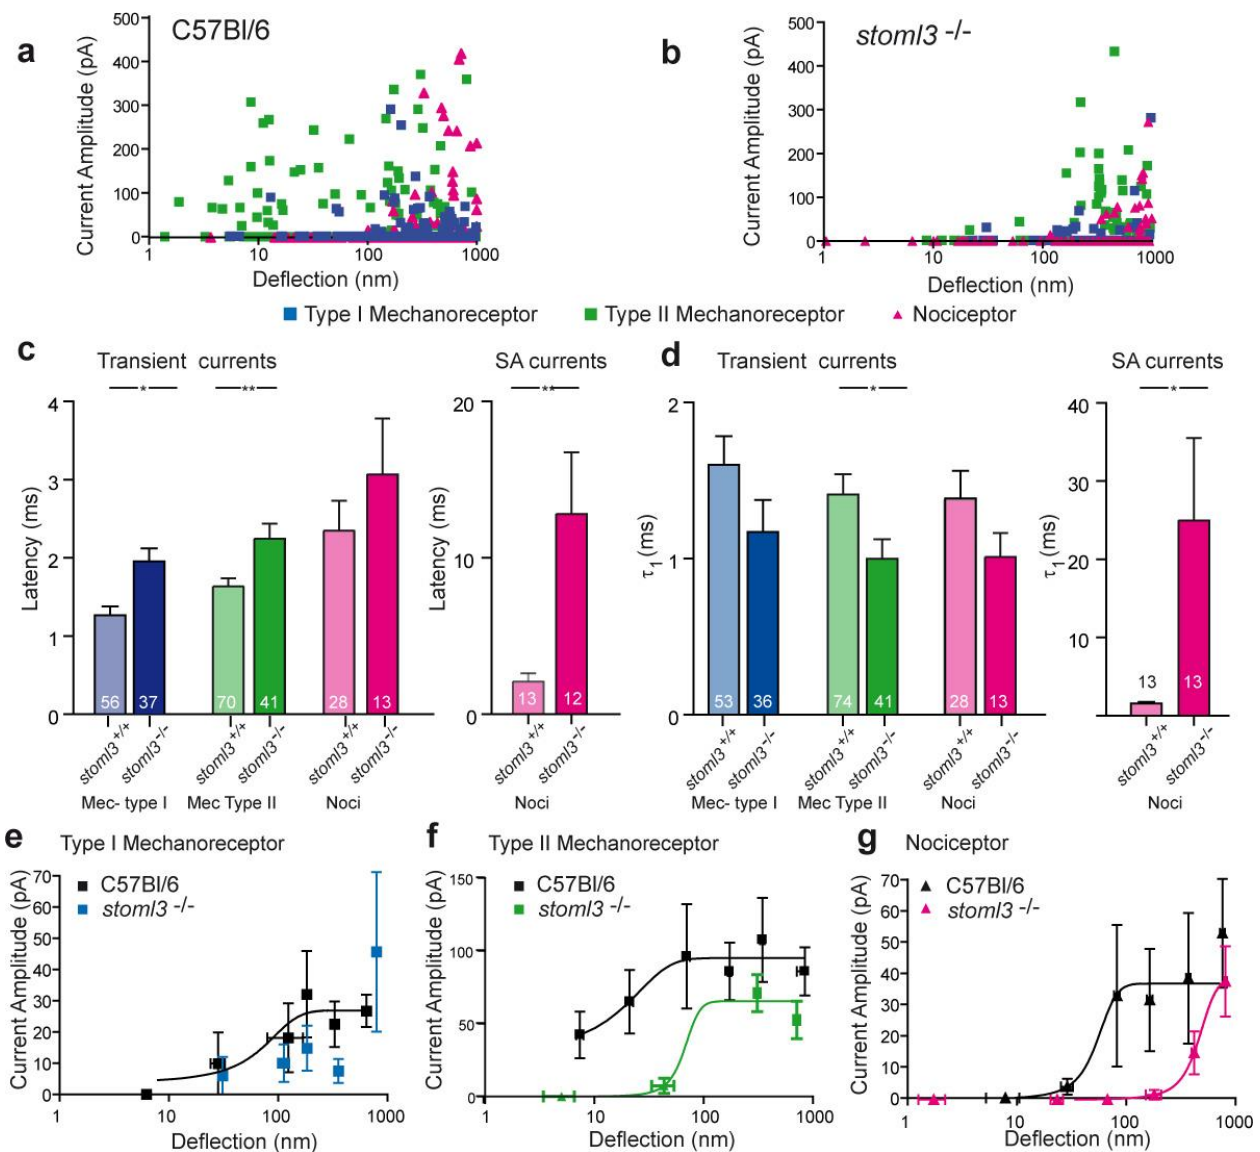

### Supplementary Figure 4: Mechanosensitivity is reduced in sensory neurons from *stoml3*<sup>-/-</sup> mice

(a) Stimulus-response curves with all individual data points for sensory neurons isolated from C57Bl/6 mice (Type I mechanoreceptors: 114 measurements, 9 cells; Type II mechanoreceptors: 129 measurements, 8 cells; nociceptors: 110 measurements, 13 cells). (b) Stimulus-response curves with all individual data points for sensory neurons isolated from *stoml3*<sup>-/-</sup> mice (Type I mechanoreceptors: 48 measurements, 7 cells; Type II mechanoreceptors: 94 measurements, 8 cells; nociceptors: 89 measurements, 9 cells). (c) The latency of channel gating was significantly shorter for Type I mechanoreceptors; Type II mechanoreceptors and SA currents in nociceptors for neurons isolated from C57Bl/6 mice versus those isolated from the *stoml3*<sup>-/-</sup> mice (Student's *t*-test; \*  $p < 0.05$ ; \*\*  $p < 0.01$ ). (d) There is a trend for a shorter time constant of activation ( $\tau_1$ ) of transient currents in all cell types isolated from the *stoml3*<sup>-/-</sup> mice; this was only significant for Type II mechanoreceptors (Student's *t*-test; \*  $p < 0.05$ ). In contrast,  $\tau_1$  for SA-currents in nociceptors isolated from *stoml3*<sup>-/-</sup> mice was significantly longer than observed for SA-currents in cells isolated from C57Bl/6 mice (Student's *t*-test, \*  $p < 0.05$ ). Data obtained for cells cultured on arrays with  $k = 290$  pN/nm;  $n$  numbers indicated on graphs represent number of currents measured within each data set and used for this analysis, data displayed as mean  $\pm$  s.e.m. (e) Stimulus response curves for wild-type Type I mechanoreceptors (black symbols/trace, data averaged from 114 measurements from 9 cells) vs *stoml3*<sup>-/-</sup> mice (blue symbols/trace, data averaged from 48 measurements from 7 cells). (f) Stimulus-response curves for wild-type, (black symbols/trace, 129 measurements, 8 cells) vs *stoml3*<sup>-/-</sup> Type II mechanoreceptors (green symbols/trace, 94 measurements, 8 cells). (g) Averaged stimulus-response curves for wild type (black symbols/trace, 110 measurements, 13 cells) vs *stoml3*<sup>-/-</sup> nociceptors (magenta symbols/trace, 89 measurements, 9 cells). (e-g) Data have been fit with a Boltzmann function with constraint that the minimum value is set to zero; points displayed as mean  $\pm$  s.e.m. in both x and y.)

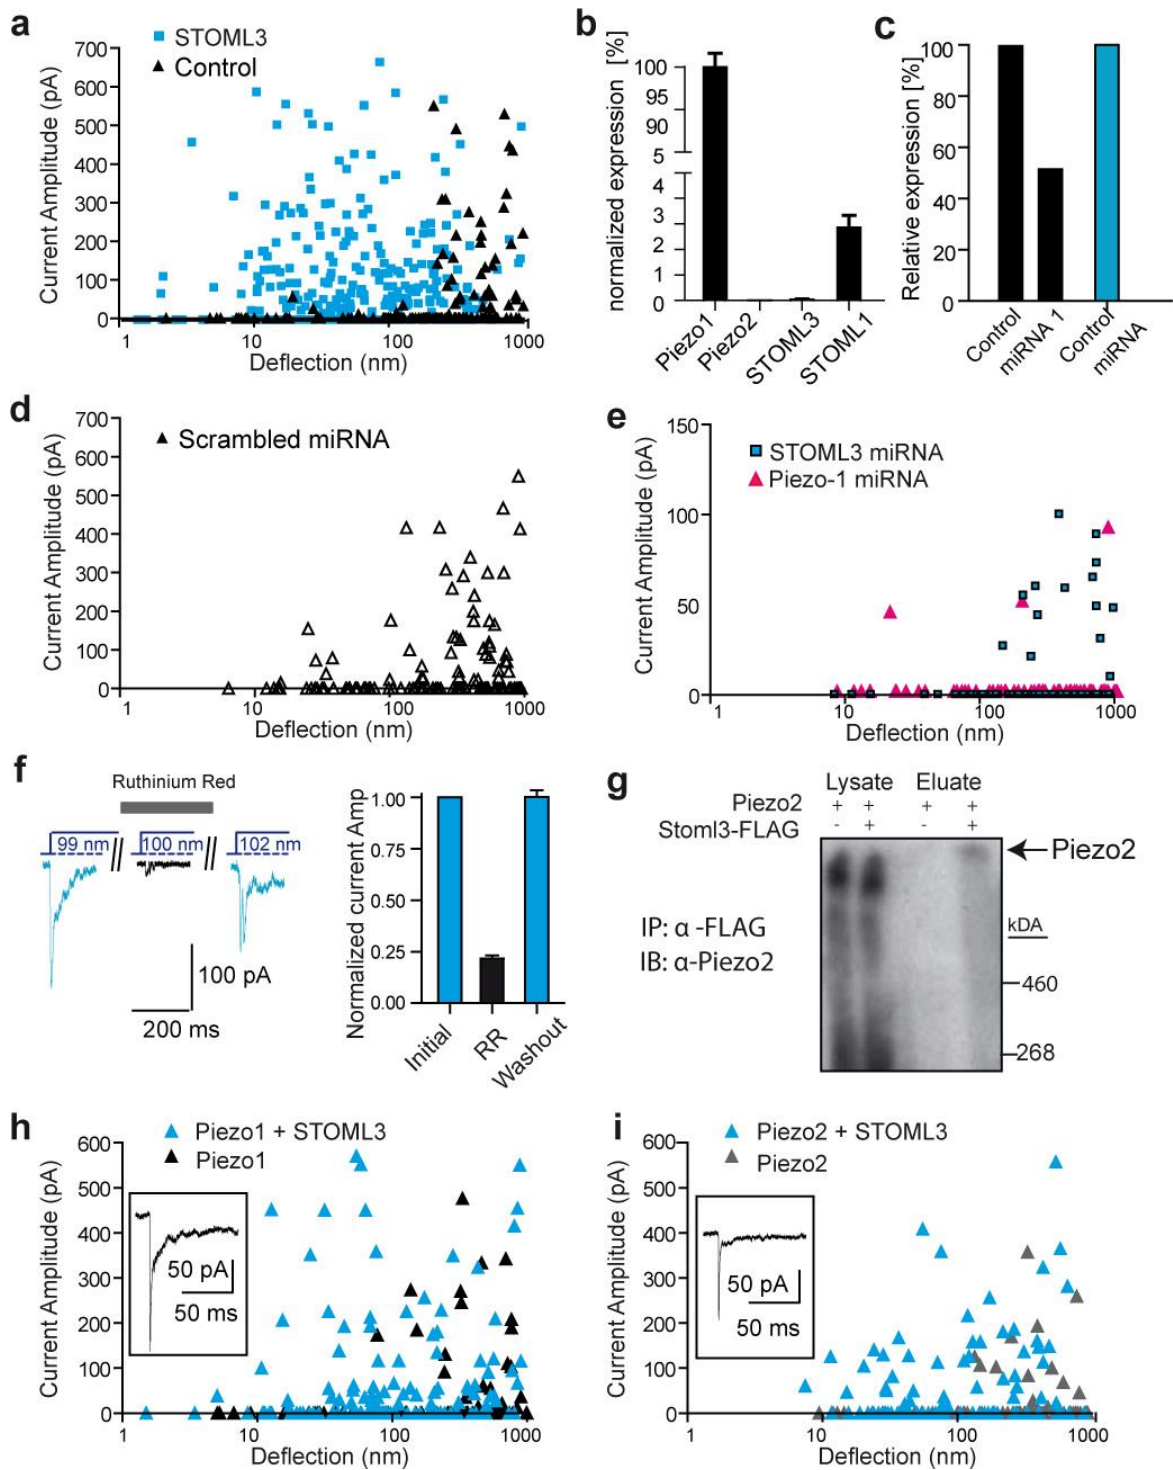

**Supplementary Figure 5: STOML3 tunes Piezo channel-mediated mechanosensitivity**

(a) Stimulus-response curves with all individual data points for N2a cells expressing Lifeact-mCherry (Control: 243 measurements, 19 cells) or STOML3-mGFP (297 measurements, 19 cells); (b) Normalized, endogenous transcript levels in control N2a cells (c) Transcript levels in N2a cells treated with miRNA: black, endogenous Piezo1  $\pm$  miRNA; cyan, overexpressed STOML3  $\pm$  miRNA. (d-e) Stimulus-response curves, all individual data points for N2a cells expressing (d) Piezo1 miRNA (100 measurements, 10 cells); (e) STOML3 miRNA2 (118 measurements, 10 cells); scrambled miRNA (145 measurements, 12 cells); (f) Application of Ruthenium Red to N2a cells overexpressing STOML3; representative current traces, current amplitude was normalized against pre-treatment currents, data represents average of triplicate measurements. (g) Western blot from STOML3-mediated pulldown of Piezo2, detected using an anti-Piezo2 antibody. (h-i) Stimulus-response curves with all individual data points for HEK-293 cells expressing (h) Piezo1 (103 measurements, 9 cells) or Piezo1 plus fluorescently-tagged STOML3 (135 measurements, 11 cells); (i) Piezo2 (107 measurements, 10 cells) or Piezo2 plus fluorescently-tagged STOML3 (93 measurements, 9 cells). Inserts are representative currents.

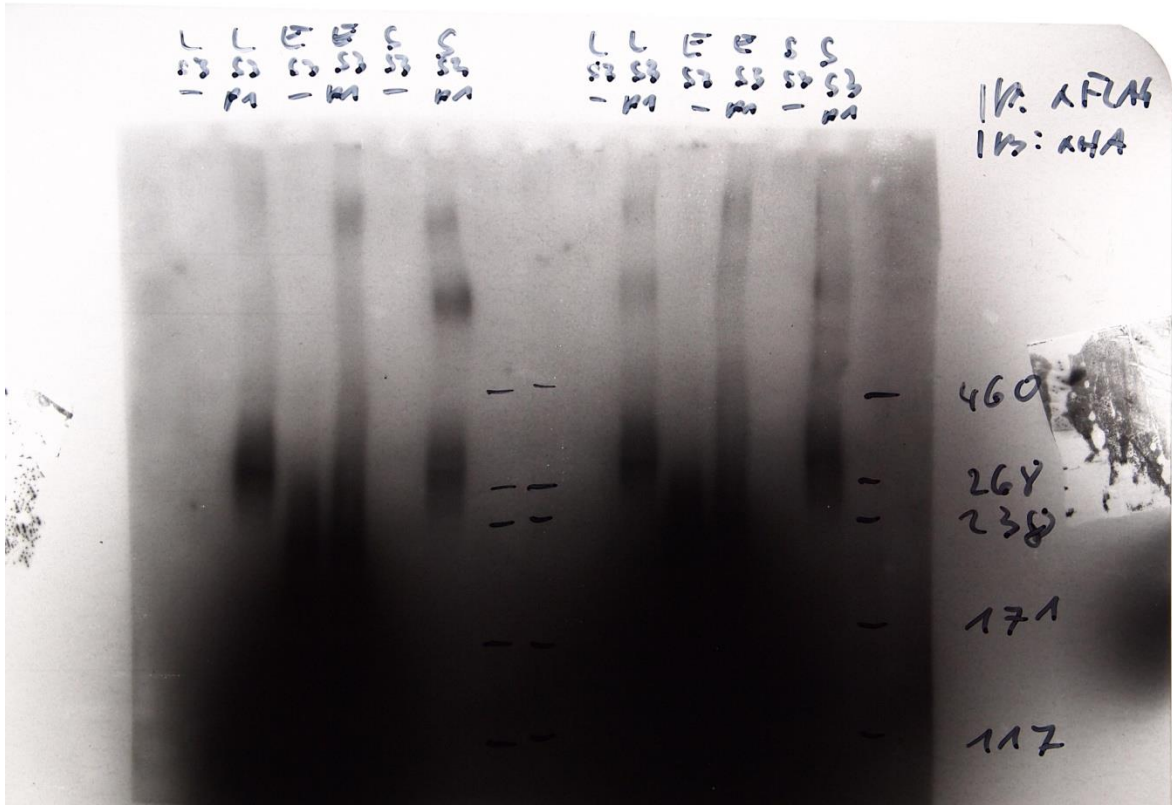

Supplementary Figure 6. Original blot presented in Figure 5g.

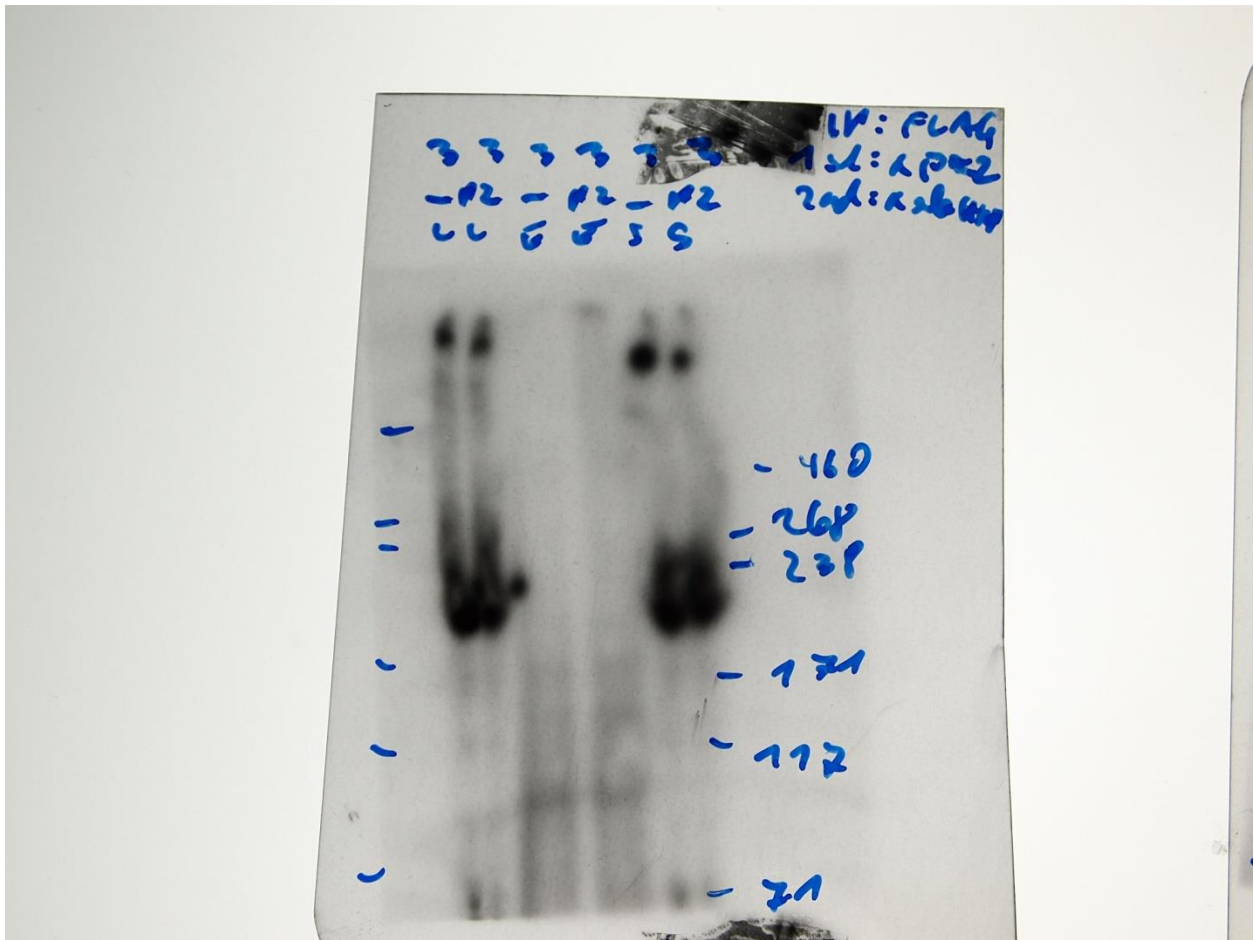

Supplementary Figure 7. Original blot presented in Supplementary Figure 5g.

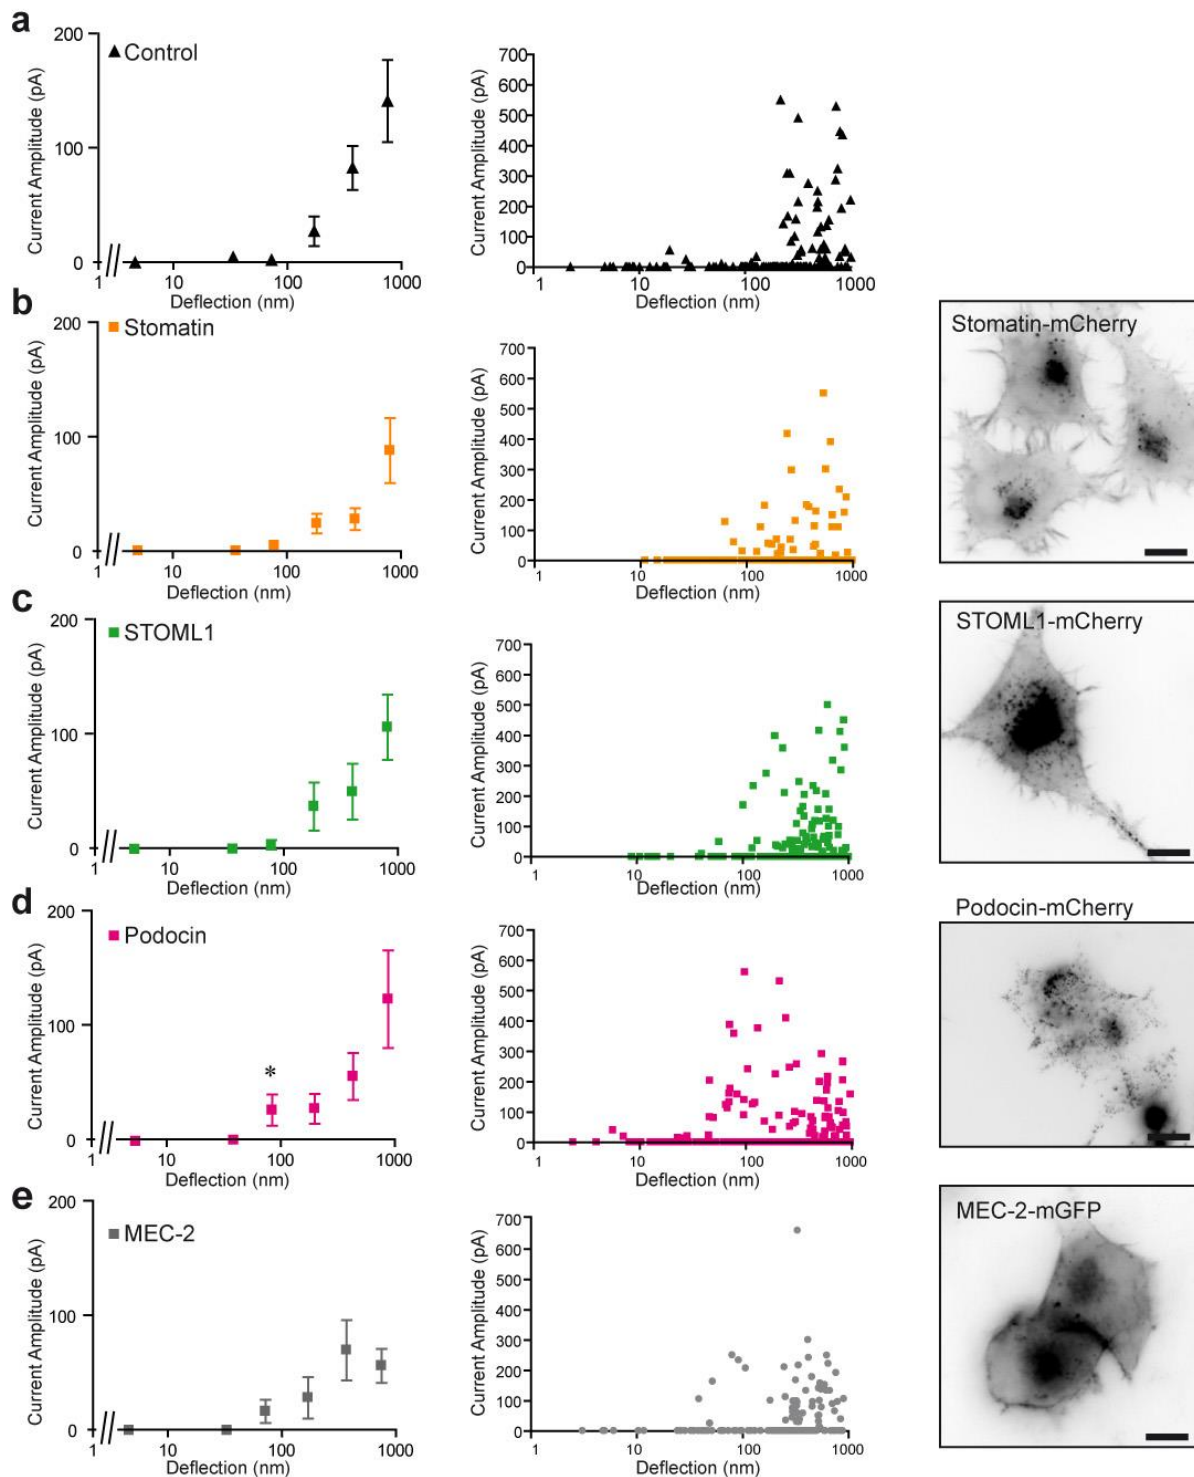

**Supplementary Figure 8. Stomatin-domain proteins and N2a cell mechanosensitivity**

(a-e) Stimulus-response curves with all individual data points and the corresponding plots averaged across cells for N2a cells expressing fluorescently-tagged (a) Lifeact (243 measurements, 26 cells); (b) Stomatin (132 measurements, 15 cells); (c) STOML1 (176 measurements, 12 cells); (d) Podocin (237 measurements, 15 cells); (e) MEC-2 (149 measurements, 13 cells). Star indicates data point significantly different from control (a), (Student's *t*-test, \*  $p < 0.05$ ; data presented as mean  $\pm$  s.e.m.). Inverted epifluorescent images are presented to show cellular distribution of over-expressed proteins, scale bar 10  $\mu$ m. In all cases the over expressed stomatin-domain family protein is localized to the plasma membrane and an intracellular vesicle pool, as previously described for Stomatin and STOML3<sup>40</sup>.



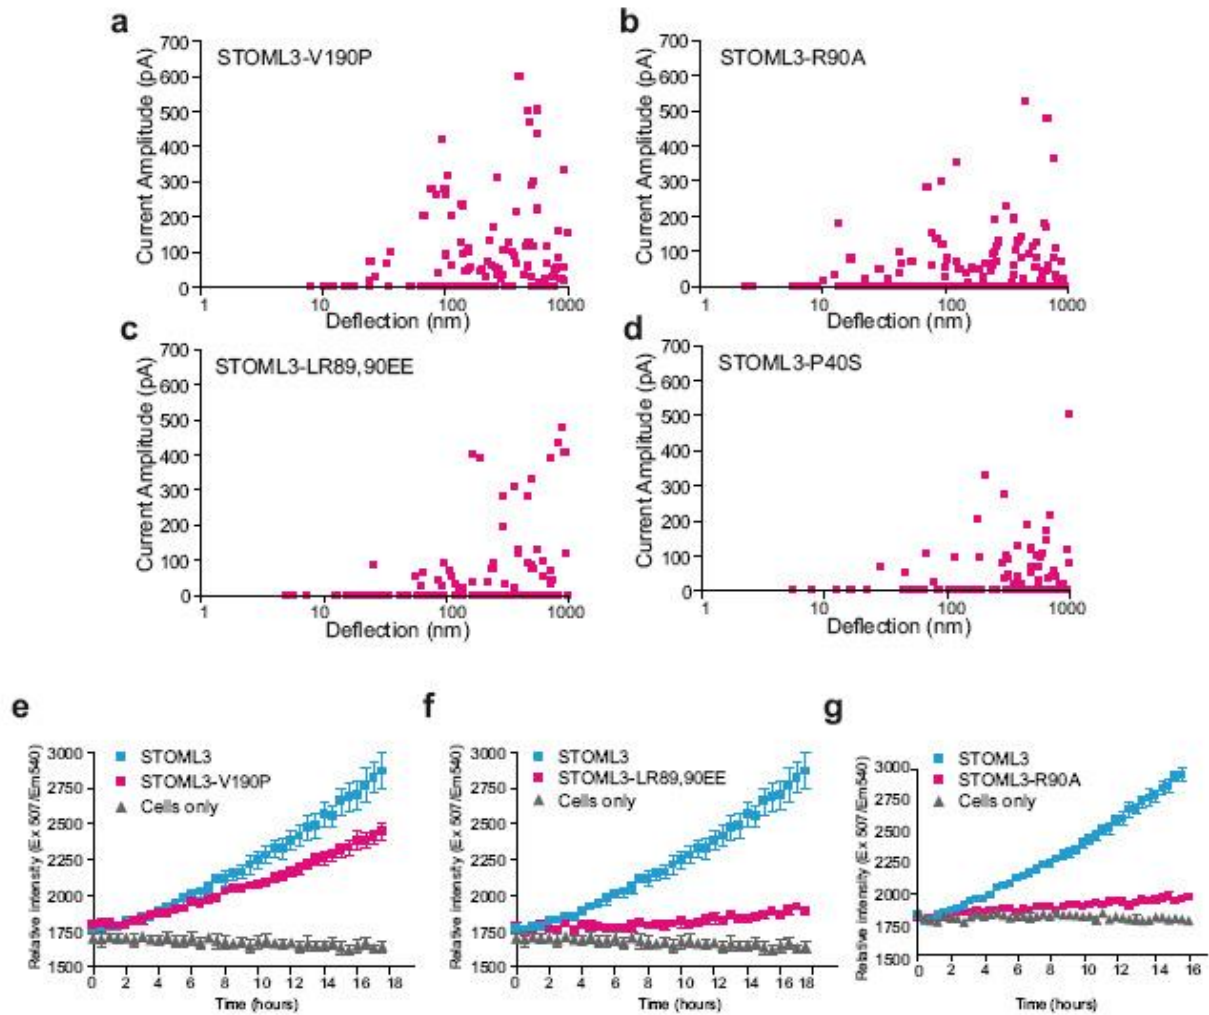

**Supplementary Figure 9: The effect on mechanotransduction and oligomerization of STOML3 mutations**

(a-d) Stimulus-response curves with all individual data points for N2a cells expressing (a) STOML3-V190P-mGFP (172 measurements, 15 cells); (b) STOML3-R90A-mGFP (218 measurements, 15 cells) (c) STOML3-LR89,90EE-mGFP (136 measurements, 12 cells).(d) STOML3-P40S-mGFP (142 measurements, 15 cells) (e-g) Signal development in BiFC assay of STOML3 oligomerization. Cells were transfected with a plasmid encoding STOML3 fused to the N-terminal BiFC fragment (VN) as bait. Fusion proteins of STOML3 variants containing mutations V190P (e), LR89,90EE (f) or P40S (g) with the C-terminal BiFC fragment (VC) were used as prey. As a positive control wtSTOML3-VC was used as prey. Data presented in each graph were compared from a single plate, represent an average of four transfections for each condition and are displayed as mean  $\pm$  s.e.m.

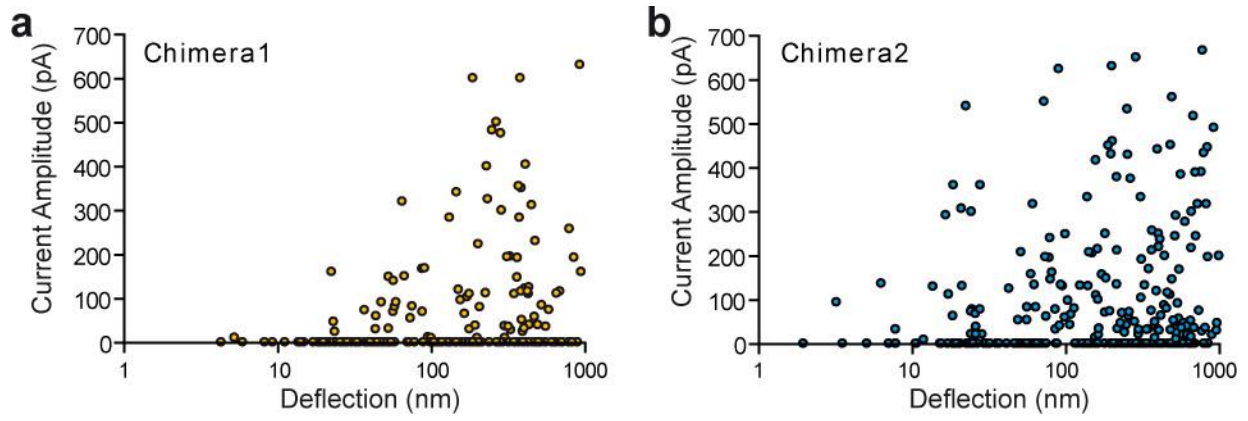

**Supplementary Figure 10: Stimulus-response curves for N2a cells expressing STOML3-Stomatin chimeras**

N2a cells expressing **(a)** Chimera1-mGFP (220 measurements, 15 cells) or, **(b)** Chimera2-mCherry (299 measurements, 14 cells). Note that when Chimera2 is present, mechanically-gated currents are observed with molecular-scale pillar deflections.

|                       | C57Bl/6<br>Type I mec                      | C57Bl/6<br>Type II Mec                      | C57Bl/6<br>Noci                      |
|-----------------------|--------------------------------------------|---------------------------------------------|--------------------------------------|
|                       | Pillar array                               | Pillar array                                | Pillar array                         |
| Mice                  | 6                                          | 7                                           | 9                                    |
| Cells                 | 9                                          | 8                                           | 13                                   |
| Stimulation Pts       | 24                                         | 19                                          | 24                                   |
| Measurements          | 114                                        | 129                                         | 110                                  |
| RA                    | 29 currents                                | 25 currents                                 | 10 currents                          |
| -latency (ms)         | 1.2 ± 0.2                                  | 1.2 ± 0.2                                   | 1.8 ± 0.3                            |
| - τ <sub>1</sub> (ms) | 0.75 ± 0.2                                 | 0.9 ± 0.2                                   | 1.1 ± 0.3                            |
| - τ <sub>2</sub> (ms) | 2.6 ± 0.4                                  | 3.0 ± 0.2                                   | 2.8 ± 0.5                            |
| IA                    | 25 currents                                | 46 currents                                 | 14 currents                          |
| -latency (ms)         | 1.2 ± 0.1                                  | 1.7 ± 0.1                                   | 2.6 ± 0.7                            |
| - τ <sub>1</sub> (ms) | 2.5 ± 0.2                                  | 1.7 ± 0.1                                   | 1.3 ± 0.2                            |
| - τ <sub>2</sub> (ms) | 19.4 ± 5.8                                 | 39 ± 7.7                                    | 48.7 ± 17                            |
| SA                    | -                                          | -                                           | 18 currents                          |
| -latency (ms)         |                                            |                                             | 2.6 ± 0.6                            |
| - τ <sub>1</sub> (ms) |                                            |                                             | 1.7 ± 0.2                            |
| - τ <sub>2</sub> (ms) |                                            |                                             |                                      |
|                       | <i>stoml3</i> <sup>-/-</sup><br>Type I mec | <i>stoml3</i> <sup>-/-</sup><br>Type II Mec | <i>stoml3</i> <sup>-/-</sup><br>Noci |
|                       | Pillar array                               | Pillar array                                | Pillar array                         |
| Mice                  | 5                                          | 6                                           | 7                                    |
| Cells                 | 7                                          | 8                                           | 9                                    |
| Stimulation Pts       | 11                                         | 16                                          | 17                                   |
| Measurements          | 48                                         | 94                                          | 89                                   |
| RA                    | 28 currents                                | 19 currents                                 | 4 currents                           |
| -latency (ms)         | 1.7 ± 0.2                                  | 2.5 ± 0.3                                   | 7.8 ± 2.7                            |
| - τ <sub>1</sub> (ms) | 0.7 ± 0.1                                  | 0.8 ± 0.2                                   | 0.75 ± 0.2                           |
| - τ <sub>2</sub> (ms) | 1.2 ± 0.2                                  | 2.4 ± 0.2                                   | 2.6 ± 0.4                            |
| IA                    | 9 currents                                 | 22 currents                                 | 10 currents                          |
| -latency (ms)         | 2.2 ± 0.4                                  | 2.0 ± 0.2                                   | 2.5 ± 0.6                            |
| - τ <sub>1</sub> (ms) | 2.4 ± 0.6                                  | 1.1 ± 0.1                                   | 2.3 ± 0.8                            |
| - τ <sub>2</sub> (ms) | 19 ± 4.7                                   | 35.9 ± 8.4                                  | 58.1 ± 28                            |
| SA                    | -                                          | -                                           | 13 currents                          |
| -latency (ms)         |                                            |                                             | 13.5 ± 4.3                           |
| - τ <sub>1</sub> (ms) |                                            |                                             | 28.3 ± 11.7                          |
| - τ <sub>2</sub> (ms) |                                            |                                             | -                                    |

**Supplementary Table 1: Physiological properties of recorded Type I mechanoreceptor, Type II mechanoreceptor and nociceptor neurons**

Neuronal cells were isolated from both C57Bl/6 and *stoml3*<sup>-/-</sup> mice. For each group the mechanical latency, activation time constant ( $\tau_1$  the time constant calculated from a mono-exponential fit of the current activation) and inactivation time constant ( $\tau_2$  the inactivation time constant calculated from a mono-exponential fit of the current inactivation, when relevant) are shown. Data are displayed as mean ± s.e.m.

|                                                                          | 0-10     | 10-50     | 50-100   | 100-250  | 250-500  | 500-1000 |
|--------------------------------------------------------------------------|----------|-----------|----------|----------|----------|----------|
| <b>Sensory neurons: C57Bl/6 mice</b>                                     |          |           |          |          |          |          |
| Type I vs Type II mechanoreceptors                                       | * (5,6)  | ** (7,5)  | *(7,5)   | NS (7,5) | NS (8,3) | NS (6,4) |
| <b>Sensory neurons: C57Bl/6 mice vs <i>stoml3</i><sup>-/-</sup> mice</b> |          |           |          |          |          |          |
| Type I mechanoreceptors<br>Wild type vs <i>stoml3</i> <sup>-/-</sup>     | na       | NS (7,6)  | NS (7,6) | NS (7,6) | NS (8,6) | NS (6,6) |
| Type II mechanoreceptors<br>Wild type vs <i>stoml3</i> <sup>-/-</sup>    | *(5,6)   | *** (5,6) | ** (5,5) | NS (4,6) | NS (4,6) | na       |
| Nociceptors<br>Wild type vs <i>stoml3</i> <sup>-/-</sup>                 | NS (9,7) | NS (9,7)  | NS (8,7) | * (7,8)  | NS (9,6) | NS (9,8) |

**Supplementary Table 2: Statistical comparison of mechanically-gated current amplitude subsets of sensory neurons.**

For each individual cell, currents were binned in the size ranges indicated and the currents within each bin averaged. Bins were subsequently averaged across cells and then a Student's *t*-test (after testing that data was normally distributed) was used to determine significance. NS indicates no significant difference between two samples, na indicates that there were either too few data points to make a comparison, or all of the measurements within a bin were equal to zero. In all cases \* indicates  $p < 0.05$ ; \*\* indicates  $p < 0.01$ ; \*\*\* indicates  $p < 0.001$ . *n* numbers in brackets indicate the number of data points within each bin that were statistically compared.

|                 | Control             | STOML3             | Stomatin                | STOML1             | Podocin         | MEC-2           |
|-----------------|---------------------|--------------------|-------------------------|--------------------|-----------------|-----------------|
| Transfections   | 7                   | 10                 | 4                       | 5                  | 4               | 4               |
| Cells           | 31                  | 19                 | 15                      | 12                 | 15              | 13              |
| Stimulation Pts | 58                  | 35                 | 24                      | 21                 | 33              | 22              |
| Measurements    | 388                 | 297                | 132                     | 176                | 237             | 149             |
| RA-like         | 34%                 | 34%                | 24%                     | 24%                | 30%             | 32%             |
| -latency (ms)   | 2.6 ± 0.4           | 1.9 ± 0.2          | 2.9 ± 0.9               | 1.6 ± 0.3          | 3.1 ± 0.9       | 2.2 ± 0.6       |
| - $\tau_1$ (ms) | 0.8 ± 0.2           | 0.8 ± 0.1          | 0.8 ± 0.3               | 0.8 ± 0.1          | 1.0 ± 0.2       | 0.7 ± 0.2       |
| - $\tau_2$ (ms) | 2.1 ± 0.2           | 1.6 ± 0.2          | 1.4 ± 0.3               | 1.4 ± 0.2          | 1.4 ± 0.2       | 1.9 ± 0.3       |
| IA-like         | 31%                 | 36%                | 24%                     | 26%                | 25%             | 40%             |
| -latency (ms)   | 3.0 ± 0.5           | 2.3 ± 0.4          | 2.3 ± 0.7               | 1.5 ± 0.2          | 4.1 ± 1.1       | 2.5 ± 0.4       |
| - $\tau_1$ (ms) | 1.1 ± 0.3           | 2.2 ± 0.4          | 1.0 ± 0.2               | 1.9 ± 0.5          | 2.8 ± 0.1       | 1.5 ± 0.2       |
| - $\tau_2$ (ms) | 23.0 ± 2.4          | 18.6 ± 1.4         | 16.2 ± 2.5              | 16.8 ± 3.0         | 18.0 ± 3.2      | 18.0 ± 2.8      |
| SA-like         | 35%                 | 30%                | 51%                     | 50%                | 44%             | 27%             |
| -latency (ms)   | 2.3 ± 0.5           | 1.9 ± 0.2          | 1.9 ± 0.4               | 2.3 ± 0.4          | 2.9 ± 0.4       | 1.8 ± 0.4       |
| - $\tau_1$ (ms) | 2.1 ± 0.4           | 2.5 ± 0.3          | 1.7 ± 0.3               | 3.6 ± 0.8          | 1.0 ± 0.2       | 2.5 ± 0.7       |
| - $\tau_2$ (ms) | -                   | -                  | -                       | -                  | -               | -               |
|                 | <b>STOML3-V190P</b> | <b>STOML3-R90A</b> | <b>STOML3-LR89,90EE</b> | <b>STOML3-P40S</b> | <b>Chimera1</b> | <b>Chimera2</b> |
| Transfections   | 6                   | 4                  | 6                       | 4                  | 4               | 4               |
| Cells           | 15                  | 15                 | 12                      | 15                 | 15              | 14              |
| Stimulation Pts | 30                  | 29                 | 20                      | 29                 | 28              | 24              |
| Measurements    | 172                 | 218                | 136                     | 142                | 220             | 299             |
| RA-like         | 39%                 | 31%                | 25%                     | 36%                | 57%             | 43%             |
| -latency (ms)   | 1.9 ± 0.3           | 1.7 ± 0.4          | 2.5 ± 0.5               | 1.9 ± 0.3          | 2.4 ± 0.4       | 3.0 ± 0.3       |
| - $\tau_1$ (ms) | 0.8 ± 0.2           | 0.8 ± 0.2          | 0.6 ± 0.1               | 0.8 ± 0.2          | 0.8 ± 0.2       | 0.6 ± 0.8       |
| - $\tau_2$ (ms) | 1.7 ± 0.2           | 2.1 ± 0.2          | 1.9 ± 0.3               | 1.3 ± 0.2          | 1.5 ± 0.2       | 1.6 ± 0.2       |
| IA-like         | 32%                 | 35%                | 40%                     | 35%                | 19%             | 22%             |
| -latency (ms)   | 1.7 ± 0.2           | 2.2 ± 0.4          | 2.8 ± 0.4               | 1.9 ± 0.3          | 3.8 ± 1.1       | 3.1 ± 0.5       |
| - $\tau_1$ (ms) | 1.2 ± 0.2           | 1.7 ± 0.4          | 1.1 ± 0.3               | 0.9 ± 0.3          | 1.1 ± 0.4       | 0.8 ± 0.2       |
| - $\tau_2$ (ms) | 16 ± 2.2            | 18 ± 2.3           | 14.5 ± 2.3              | 16 ± 2.5           | 16 ± 3.0        | 15 ± 2.2        |
| SA-like         | 28%                 | 33%                | 34%                     | 28%                | 23%             | 35%             |
| -latency (ms)   | 1.9 ± 0.3           | 1.9 ± 0.3          | 2.2 ± 0.3               | 3.1 ± 0.8          | 2.6 ± 0.5       | 2.5 ± 0.3       |
| - $\tau_1$ (ms) | 1.7 ± 0.3           | 2.3 ± 1            | 1.4 ± 0.2               | 1.3 ± 0.7          | 1.2 ± 0.73      | 1.5 ± 0.2       |
| - $\tau_2$ (ms) | -                   | -                  | -                       | -                  | -               | -               |

**Supplementary Table 3: Electrophysiological properties of N2a cells overexpressing stomatin-domain family proteins or variants of STOML3.** For each group, currents were classed as RA-like ( $\tau_2 < 5$  ms), IA-like ( $\tau_2$  5-50 ms) or SA-like ( $\tau_2 > 50$  ms). The fraction of currents classed in each group, the mechanical latency, activation time constant ( $\tau_1$ ; calculated from a mono-exponential fit of the current activation) and inactivation time constant ( $\tau_2$ ; calculated from a mono-exponential fit of the current inactivation, when relevant) are shown as mean ± s.e.m. Control cells were transfected with a plasmid encoding LifeAct alone and in this case includes data collected for cells expressing the scrambled miRNA.

|                                             | 0-10       | 10-50       | 50-100      | 100-250     | 250-500     | 500-1000    |
|---------------------------------------------|------------|-------------|-------------|-------------|-------------|-------------|
| <b>N2a Cells</b>                            |            |             |             |             |             |             |
| <i>STOML3 vs control</i>                    | na         | *** (17,26) | *** (15,25) | *** (12,26) | NS (7,25)   | na          |
| <b>N2a Cells: miRNA knockdowns</b>          |            |             |             |             |             |             |
| <i>Scram vs Piezo1 miRNA</i>                | na         | na          | na          | NS (9,10)†  | ** (9,10)†  | *** (9,10)† |
| <i>Scram vs STOML3 miRNA</i>                | na         | na          | na          | NS (11,10)† | ** (11,10)† | ** (9,10)†  |
| <b>N2a Cells: STOML3 variants</b>           |            |             |             |             |             |             |
| V190P vs control                            | na         | NS (15,26)  | NS (13,25)  | NS (15,26)  | NS (14,25)  | NS (11,21)  |
| V190P vs STOML3                             | na         | *** (15,17) | ** (13,16)  | * (15,12)   | NS (14,7)   | na          |
| R90A vs control                             | na         | NS (12,26)  | NS (10,25)  | NS (12,26)  | NS (11,25)  | NS (7,21)   |
| R90A vs STOML3                              | NS (12,12) | *** (12,17) | * (10,16)   | ** (12,12)  | NS (11,7)   | na          |
| LR89.90EE vs control                        | na         | NS (13,26)  | NS (12,25)  | NS (13,26)  | NS (12,25)  | NS (10,21)  |
| LR89.90EE vs STOML3                         | na         | *** (13,17) | ** (12,16)  | *** (13,12) | NS (12,7)   | na          |
| P40S vs control                             | na         | NS (15,26)  | NS (15,25)  | NS (14,26)  | * (13,25)   | NS (15,21)  |
| P40S vs STOML3                              | na         | *** (15,17) | *** (15,16) | *** (14,12) | *** (13,7)  | na          |
| Chimera1 vs Chimera2                        | NS (13,5)  | * (12,11)   | NS (11,7)   | * (14, 11)  | NS (13,13)  | NS (12,11)  |
| Chimera1 vs control                         | na         | NS (12,26)  | ** (11,25)  | NS (14, 26) | NS (13,25)  | NS (12,21)  |
| Chimera1 vs STOML3                          | NS (13,12) | *** (12,17) | * (11,16)   | ** (14, 12) | NS (13,7)   | na          |
| <i>Chimera2 vs control</i>                  | na         | *** (11,26) | *** (7,25)  | *** (11,26) | NS (13,25)  | NS (11,21)  |
| <i>Chimera2 vs STOML3</i>                   | NS (5,12)  | NS (11,17)  | NS (7,16)   | NS (11,12)  | NS (13,7)   | na          |
| <b>N2a Cells : Stomatin domain proteins</b> |            |             |             |             |             |             |
| STOM vs control                             | na         | na          | NS (15,25)  | NS (15,26)  | NS (15,25)  | NS (15, 21) |
| STOM vs STOML3                              | na         | na          | ** (15,16)  | *** (15,12) | *** (15,7)  | na          |
| STOML1 vs control                           | na         | NS (12, 26) | NS (12,25)  | NS (12,26)  | NS (12,25)  | NS (11,21)  |
| STOML1 vs STOML3                            | NS         | *** (12,17) | ** (12,16)  | *** (12,12) | * (12,7)    | na          |
| Podocin vs control                          | na         | NS (15,26)  | * (14,25)   | NS (14,26)  | NS (14,25)  | NS (14, 21) |
| Podocin vs STOML3                           | NS (15,12) | *** (15,17) | ** (14,16)  | *** (14,12) | * (14,7)    | na          |
| MEC-2 vs control                            | na         | na          | NS (13,25)  | NS (13,26)  | NS (12,25)  | NS (10,21)  |
| MEC-2 vs STOML3                             | na         | na          | ** (13,16)  | ** (13,12)  | NS (12,7)   | na          |
| <b>HEK-293 cells</b>                        |            |             |             |             |             |             |
| <i>Piezo1 vs Piezo1 + STOML3</i>            | na         | ** (9,8)    | * (9,10)    | ** (9,10)   | NS (9,6)    | NS (7,6)    |
| <i>Piezo2 vs Piezo2 + STOML3</i>            | na         | * (9,8)     | * (9,7)     | * (9,7)     | * (9,7)     | ** (8,4)    |

**Supplementary Table 4.** Statistical comparison of mechanically-gated current amplitude in the presence of Stomatin-like proteins and variants. For each individual cell, currents were binned in the size ranges indicated and the currents within each bin averaged. Bins were subsequently averaged across cells and then a Student's *t*-test (when data normally distributed) or Mann Whitney† test (for non-parametric data sets) was used to compare bins between samples. All stomatin-like proteins and STOML3 variants were compared with results from cells overexpressing STOML3 or control N2a cells. NS indicates no significant difference between two samples, na indicates that there were either too few data points to make a comparison, or all of the measurements within a bin were equal to zero. In all cases \*  $p < 0.05$ ; \*\*  $p < 0.01$ ; \*\*\*  $p < 0.001$ . *n* numbers in brackets indicate data points (i.e. cells) within each bin that were statistically compared. STOML3 significantly increased mechanotransduction with deflections of 10-50, 50-100 and 100-250 nm in comparison with control N2a cells; as did Chimera2. N2a mechanosensitivity of cells overexpressing Chimera2 was not significantly different in comparison with cells overexpressing STOML3, indicating that the STOML3-stomatin domain is necessary for the increase in N2a mechanosensitivity. The only other proteins that differed significantly from the control within any of the stimulus ranges were Chimera1 (50-100 nm) and Podocin (50-100nm); however in both cases the cellular response was still significantly smaller than in the presence of STOML3. This indicates that Chimera1 and Podocin can marginally shift the mechanosensitivity range in N2a cells.

|                 | <b>HEK-293<br/>Piezo1</b> | <b>HEK-293<br/>Piezo1 + STOML3</b> | <b>HEK-293<br/>Piezo2</b> | <b>HEK-293<br/>Piezo2 + STOML3</b> |
|-----------------|---------------------------|------------------------------------|---------------------------|------------------------------------|
| Transfections   | 4                         | 5                                  | 4                         | 5                                  |
| Cells           | 9                         | 11                                 | 10                        | 9                                  |
| Stimulation Pts | 17                        | 18                                 | 19                        | 16                                 |
| Measurements    | 103                       | 135                                | 107                       | 93                                 |
| RA-like         | 10%                       | 37%                                | 23%                       | 53%                                |
| -latency (ms)   | 1.0 ± 0.                  | 2.2 ± 0.4                          | 2.4 ± 0.6                 | 2.3 ± 0.4                          |
| - $\tau_1$ (ms) | 0.6 ± 0.2                 | 0.5 ± 0.1                          | 0.5 ± 0.1                 | 0.7 ± 0.1                          |
| - $\tau_2$ (ms) | 2.3 ± 0.4                 | 1.5 ± 0.3                          | 1.2 ± 0.4                 | 1.5 ± 0.2                          |
| IA-like         | 41%                       | 35%                                | 23%                       | 27%                                |
| -latency (ms)   | 1.4 ± 0.2                 | 2.2 ± 0.5                          | 4.3 ± 1.2                 | 1.5 ± 0.4                          |
| - $\tau_1$ (ms) | 0.9 ± 0.2                 | 1.0 ± 0.1                          | 2.4 ± 0.6                 | 0.8 ± 0.1                          |
| - $\tau_2$ (ms) | 16 ± 2.2                  | 20 ± 2.8                           | 29 ± 10                   | 20 ± 4.7                           |
| SA-like         | 48%                       | 28%                                | 54%                       | 20%                                |
| -latency (ms)   | 2.4 ± 0.7                 | 2.1 ± 0.4                          | 2.0 ± 0.32                | 2.6 ± 0.6                          |
| - $\tau_1$ (ms) | 2.0 ± 0.7                 | 2.0 ± 0.3                          | 4.4 ± 1.2                 | 1.1 ± 0.3                          |
| - $\tau_2$ (ms) | -                         | -                                  | -                         | -                                  |

**Supplementary Table 5: Electrophysiological properties of HEK-293 cells overexpressing Piezo1 or Piezo2 in the presence and absence of STOML3.** For each group currents were classed as RA-like ( $\tau_2 < 5$  ms), IA- like ( $\tau_2$  5-50 ms) or SA-like ( $\tau_2 > 50$  ms). The fraction of currents classed in each group, the mechanical latency, activation time constant ( $\tau_1$ ) and inactivation time constant ( $\tau_2$ ) are shown as mean ± s.e.m.

| Construct Name          | Plasmid used              | Encodes                                                                                | Source                            | Thanks to                                         |
|-------------------------|---------------------------|----------------------------------------------------------------------------------------|-----------------------------------|---------------------------------------------------|
| mStoml3-mEGFP           | pEGFP-N3 (Clontech)       | STOML3-mEGFP                                                                           | Current study                     |                                                   |
| mStoml3-mCherry         | pEGFP-N3 (Clontech)       | STOML3-mCherry                                                                         | Lapatsina et al 2012 <sup>1</sup> |                                                   |
| lifeact-mCherry         | pEGFP-N3 (Clontech)       | MGVADLIKKFESISKEE-mCherry                                                              | Current study                     |                                                   |
| lifeact-mEGFP           | pEGFP-N3 (Clontech)       | MGVADLIKKFESISKEE-mGFP                                                                 | Current study                     |                                                   |
| Chimera 1               | pEGFP-N3 (Clontech)       | m STOML3 <sup>1-86</sup> [Stom <sup>94-202</sup> ]<br>STOML3 <sup>196-282</sup> mEGFP  | Current study                     |                                                   |
| Chimera 2               | pEGFP-N3 (Clontech)       | mStom <sup>1-93</sup> [S STOML3 <sup>87-195</sup> ]<br>Stom <sup>203-284</sup> mCherry | Current study                     |                                                   |
| Stom-mCherry            | pEGFP-N3 (Clontech)       | Stomatin-mCherry                                                                       | Brand et al 2012 <sup>2</sup>     |                                                   |
| Mec2-mEGFP              | pEGFP-N3 (Clontech)       | MEC-2-mEGFP                                                                            | Current study                     | Miriam Goodman for MEC-2 cDNA                     |
| mStoml1-mCherry         | pEGFP-N3 (Clontech)       | STOML1-mCherry                                                                         | Current study                     | Alexei Kozlenkov                                  |
| mPodocin-mCherry        | pEGFP-N3 (Clontech)       | Podocin-mCherry                                                                        | Current study                     | Eric Honoré for podocin cDNA                      |
| mStoml3-P40S-EGFP       | pEGFP-N3 (Clontech)       | STOML3-P40S-EGFP                                                                       | Lapatsina et al 2012 <sup>1</sup> |                                                   |
| mStoml3-R90A-mEGFP      | pEGFP-N3 (Clontech)       | STOML3-R90A-mEGFP                                                                      | Current study                     |                                                   |
| mStoml3-LR89,90EE-mEGFP | pEGFP-N3 (Clontech)       | STOML3-LR89,90EE-mEGFP                                                                 | Current study                     |                                                   |
| mStoml3-V190P-mEGFP     | pEGFP-N3 (Clontech)       | STOML3-V190P-mEGFP                                                                     | Current study                     |                                                   |
| mStoml3-VC              | pBiFC-VC155               | STOML3-VC                                                                              | Current study                     | Chang-Deng Hu for pBiFC-VC155<br>Alexei Kozlenkov |
| mStoml3-VN              | pBiFC-VN173               | STOML3-VN                                                                              | Current study                     | Chang-Deng Hu for pBiFC-VC173<br>Alexei Kozlenkov |
| mStoml3-V190P-vc        | pBiFC-VC155               | STOML3-V190P-VC                                                                        | Current study                     |                                                   |
| mStoml3-R90A-vc         | pBiFC-VC155               | STOML3-R90A-VC                                                                         | Current study                     |                                                   |
| mStoml3-LR89,90EE-vc    | pBiFC-VC155               | STOML3-LR89,90EE-VC                                                                    | Current study                     |                                                   |
|                         | pcDNA 3.1(-) (Invitrogen) | Piezo1                                                                                 | Coste et al 2010 <sup>3</sup>     | Ardem Patapoutian                                 |
|                         | pCMV-sport6 (Invitrogen)  | Piezo2                                                                                 | Coste et al 2010 <sup>3</sup>     | Ardem Patapoutian                                 |
| Fam38a-HA               | pcDNA 3.1(-) (Invitrogen) | HA-Piezo1                                                                              | Current study                     | Ardem Patapoutian for Piezo-1 cDNA                |

**Supplementary Table 6: Plasmids used in this study**



| Target  | Top strand                                                                 | Bottom strand                                                              |
|---------|----------------------------------------------------------------------------|----------------------------------------------------------------------------|
| Piezol1 | 5'-TGCTGTAAAGATGTCCTTCAGGTCCAGTTTTGG<br>CCACTGACTGACTGGACCTGGGACATCTTTA-3' | 5'-CCTGTAAAGATGTCCAGGTCCAGTCAGTCAGT<br>GGCCAAAACCTGGACCTGAAGGACATCTTTAC-3' |
| STOML3  | 5'-TGCTGATGATCTTCAAGCACATCCATGTTTTGGC<br>CACTGACTGACATGGATGTTTGAAGATCAT-3' | 5'-CCTGATGATCTTCAAACATCCATGTCAGTCAGTG<br>GCCAAAACATGGATGTGCTTGAAGATCATC-3' |

**Supplementary Table 7: Sequence of miRNAs used in this study**

## Supplementary References

1. Lapatsina, L. *et al.* Regulation of ASIC channels by a stomatin/STOML3 complex located in a mobile vesicle pool in sensory neurons. *Open Biol.* doi:10.1098/rsob.120096
2. Brand, J. *et al.* A stomatin dimer modulates the activity of acid-sensing ion channels. *EMBO J.* **31**, 3635–3646 (2012).
3. Coste, B. *et al.* Piezo1 and Piezo2 Are Essential Components of Distinct Mechanically Activated Cation Channels. *Science* **330**, 55–60 (2010).
